# Supplementary material for: Two-dimensional peptide nanosheets functionalized with gold nanorods for photothermal therapy of tumors
Source: Royal Society of Chemistry journal article supplement (doi:10.1039/d3tb00074e), 2023-01-01
Supplement: d3tb00074e1.pdf [file d3tb00074e1.pdf]

## Two-dimensional peptide nanosheets functionalized with gold nanorods for photothermal therapy of tumor

Hao Kong,<sup>a†</sup> Jinru Han,<sup>b,c†</sup> Ming Yang,<sup>b</sup> Liangxue Lai,<sup>b</sup> Yabing Sun,<sup>b</sup> Xin Luan,<sup>a</sup> Wenzhi Ren,<sup>b\*</sup> Aiguo Wu,<sup>b</sup> and Gang Wei<sup>a,b\*</sup>

- <sup>a.</sup> College of Chemistry and Chemical Engineering, Qingdao University, Qingdao 266071, China. E-mail: weigroup@qdu.edu.cn (G. Wei)
- <sup>b.</sup> Cixi Institute of Biomedical Engineering, International Cooperation Base of Biomedical Materials Technology and Application, Chinese Academy of Science (CAS) Key Laboratory of Magnetic Materials and Devices and Zhejiang. E-mail: renwzh@nimte.ac.cn (W.Z. Ren)
- <sup>c.</sup> University of Chinese Academy of Sciences, No. 1 Yanqihu East Road, Huairou District, Beijing, 101408, China
- † Equal contributions to this work.

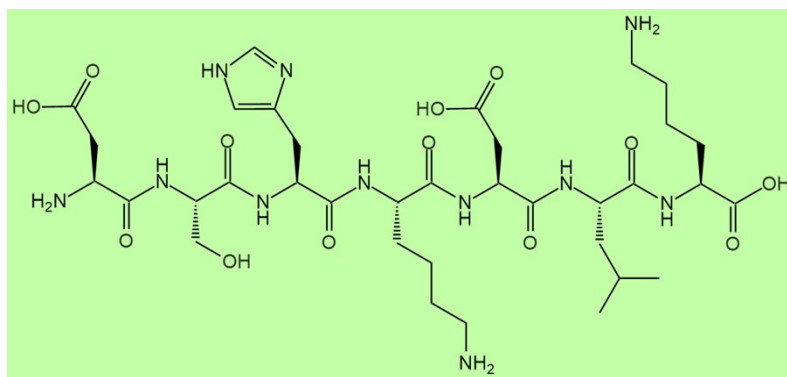

**Fig. S1** Molecular structural formula of peptide molecules with sequence DSHKDLK.

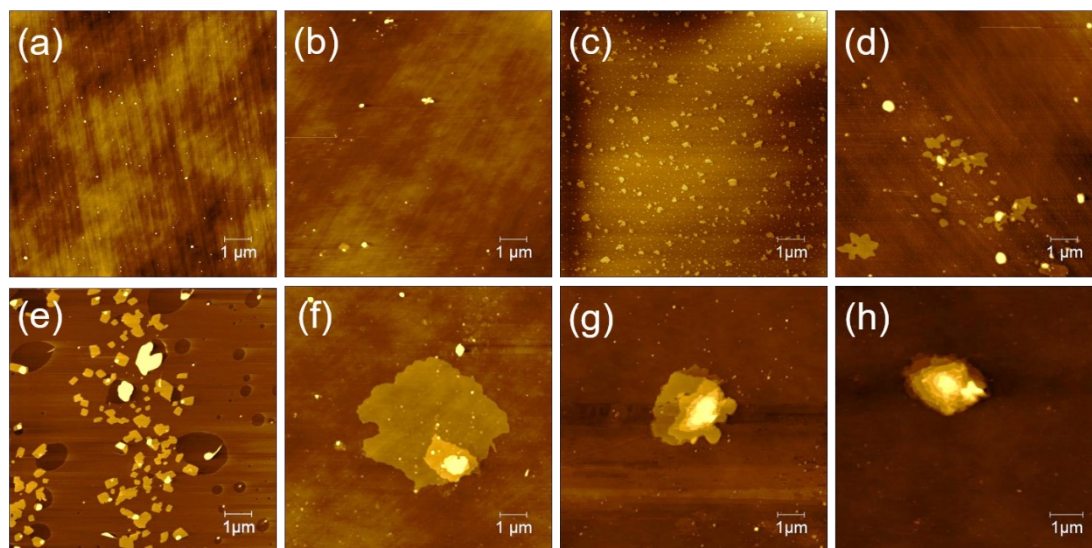

**Fig. S2** AFM images showing DSHKDLK peptide self-assembled morphology changes over time: (a) 1 h; (b) 3 h; (c) 6 h; (d) 9 h; (e) 12 h; (f) 24 h; (g) 48 h; (h) 72 h.

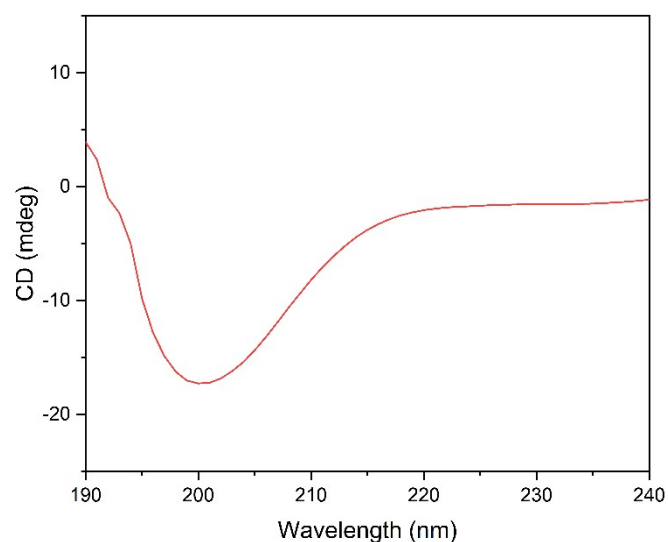

**Fig. S3** Schematic illustration of the growth of self-assembled DSHKDLK PNSs.

**Table S1.** Secondary structure contents of DSHKDLK.

| Result | Helix1 | Helix2 | Strand1 | Strand2 | Turns | Unordered | Total  |
|--------|--------|--------|---------|---------|-------|-----------|--------|
| 1      | 0.0%   | 6.7%   | 25.0%   | 13.1%   | 22.8% | 32.4%     | 100.0% |
| 2      | 0.3%   | 3.8%   | 29.0%   | 14.8%   | 21.1% | 31.0%     | 100.0% |

The secondary structure contents are analyzed from CD spectra using the Dichro Web.

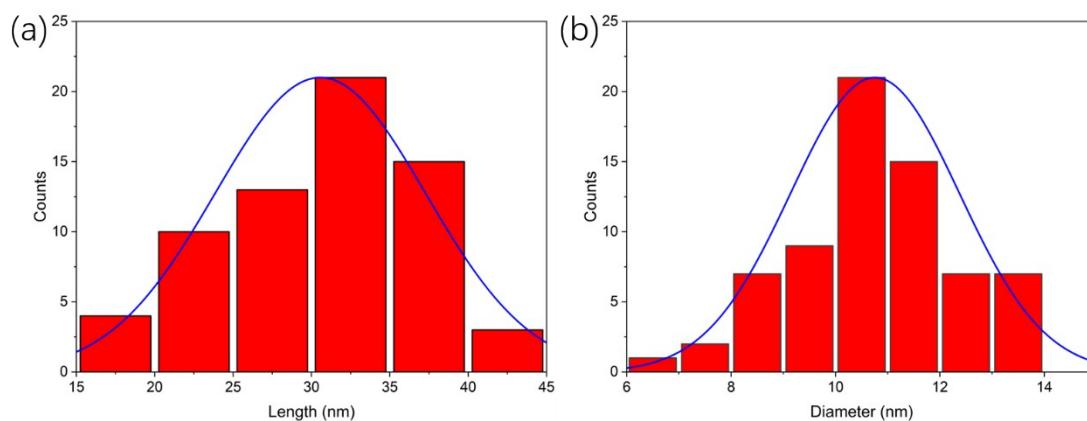

**Fig. S4** Statistical analysis of (a) the length and (b) the diameter of AuNRs.

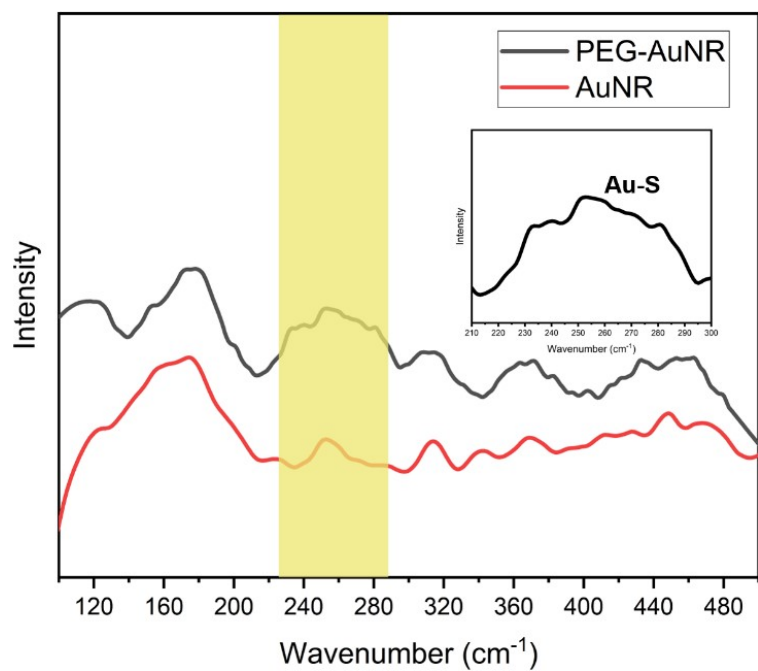

**Fig. S5** Raman spectra of AuNRs and PEG-AuNRs.

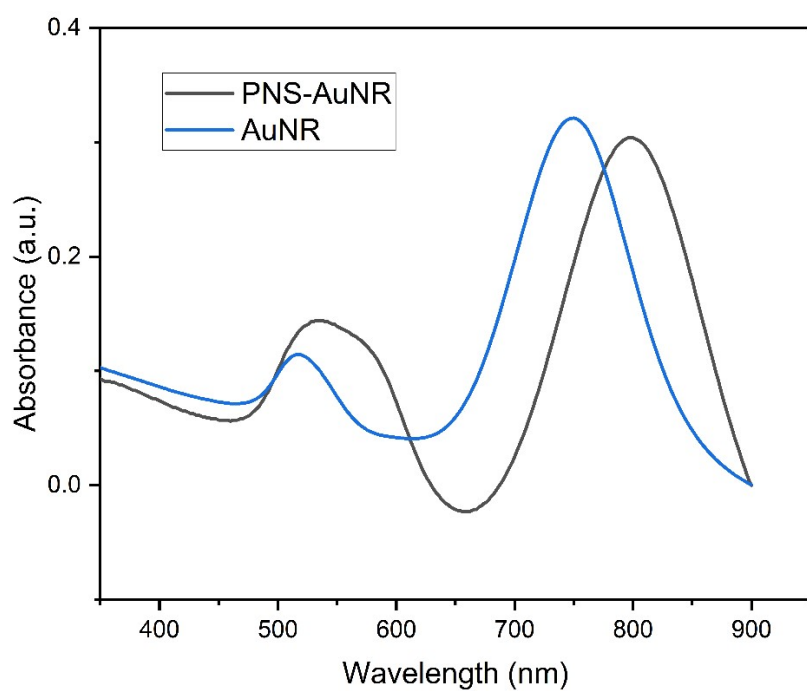

**Fig. S6** UV-vis absorption spectra of AuNRs and PNS-AuNRs.

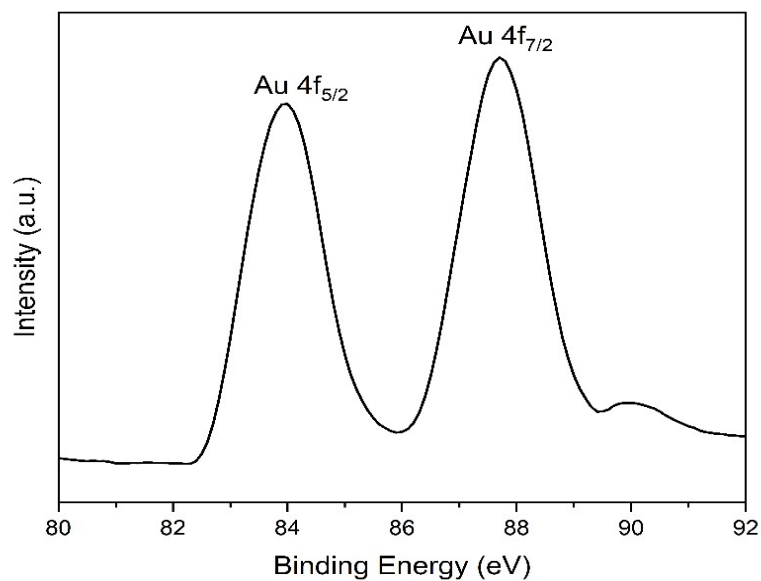

**Fig. S7** High-resolution XPS spectrum of Au 4f.

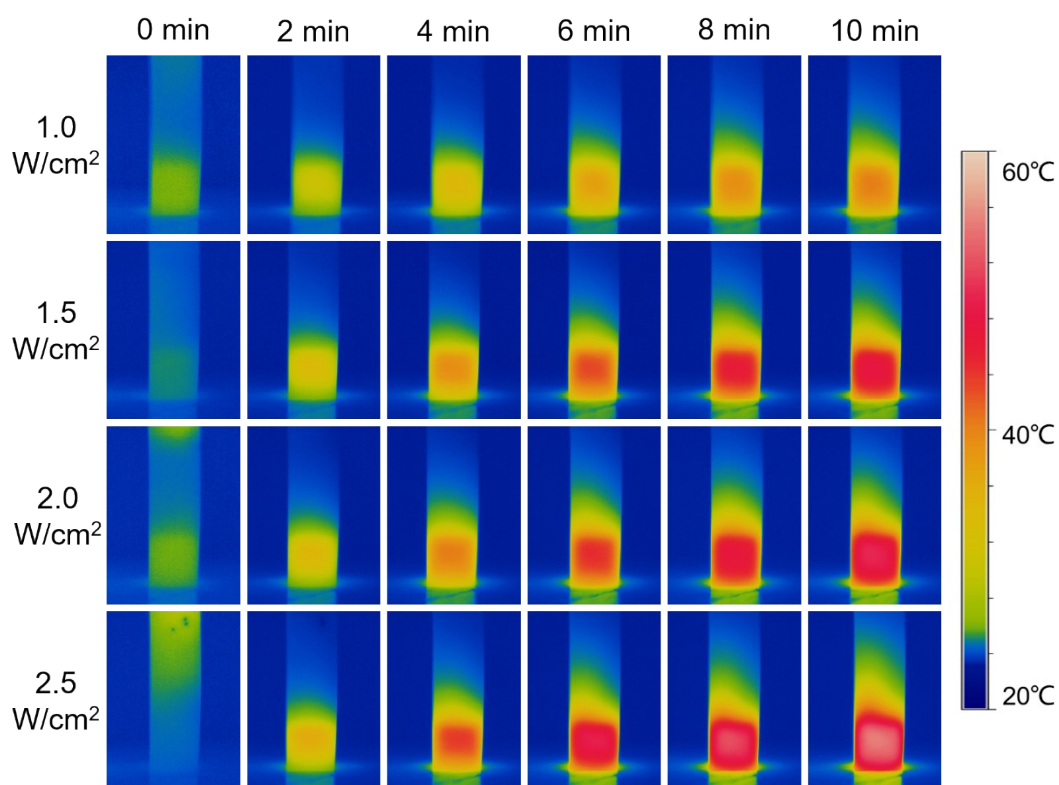

**Fig. S8** The real-time temperature changes of the PNS-AuNRs under different irradiation power at 100  $\mu\text{g mL}^{-1}$ .

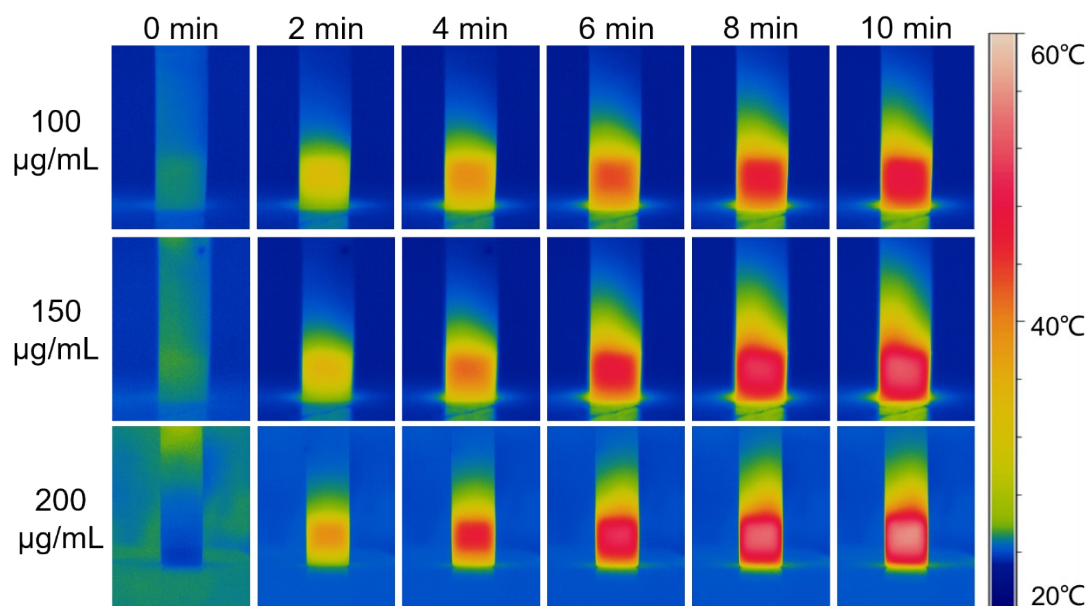

**Fig. S9** The real-time temperature changes of the PNS-AuNRs with different concentrations at  $1.5 \text{ W cm}^{-2}$  irradiation power.

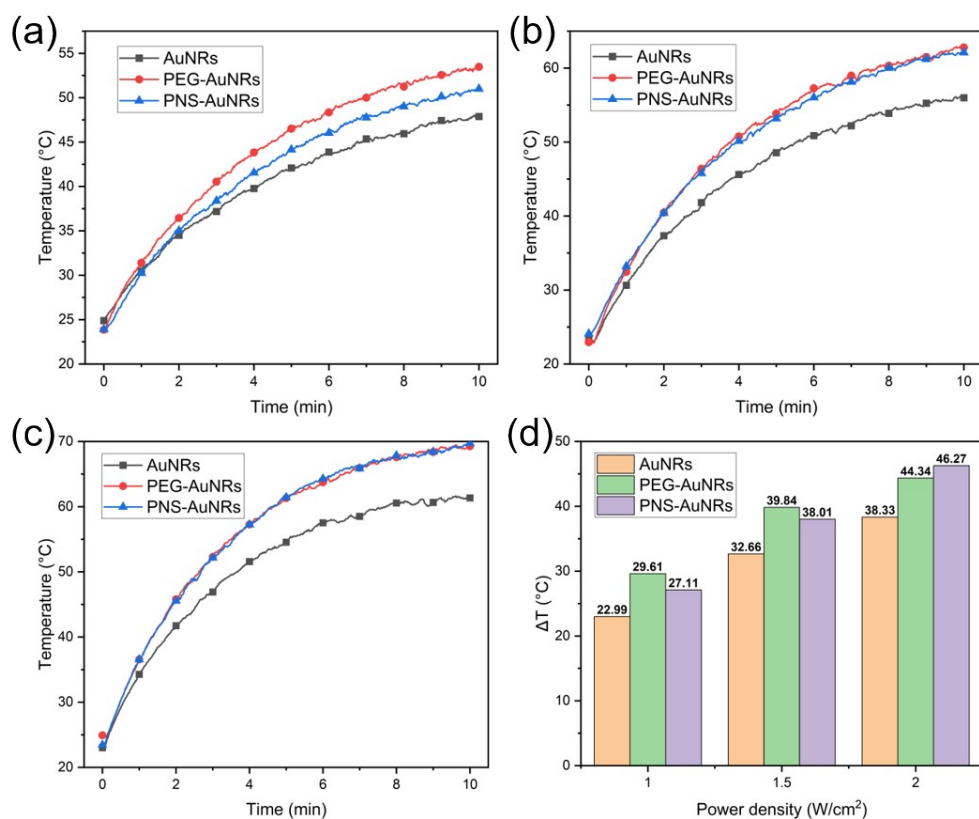

**Fig. S10** Photothermal curves of AuNRs, PEG-AuNRs, and PNS-AuNRs (at the same Au concentration) under 1 (a), 1.5 (b), and 2 (c)  $\text{W cm}^{-2}$  irradiation power; (d) The 10 min temperature change of AuNRs, PEG-AuNRs, and PNS-AuNRs (at the same Au concentration) under different irradiation power.

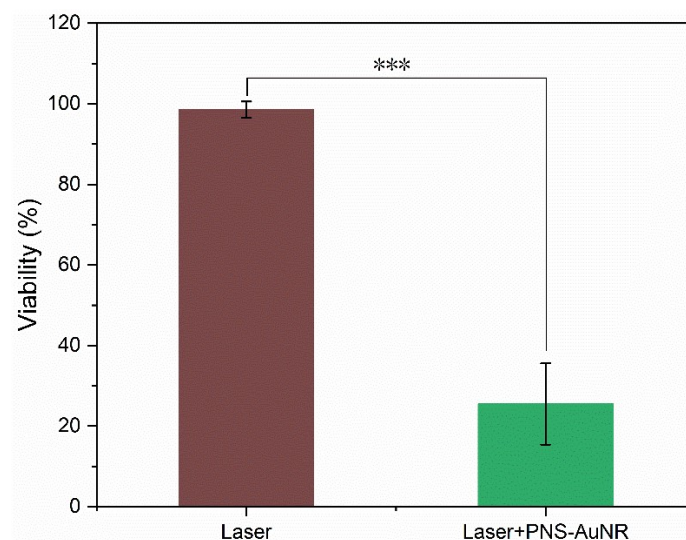

**Fig. S11** Viability of MCF-7 cells treated with or without  $100 \mu\text{g mL}^{-1}$  PNS-AuNRs and 808 nm laser irradiation at  $1.5 \text{ W cm}^{-2}$  for 10 min. Data are expressed as the mean  $\pm$  standard (n = 3). Statistically significant differences were evaluated using the Student's t -test (\*  $p < 0.05$ , \*\*  $p < 0.01$ , \*\*\*  $p < 0.001$ , ns  $> 0.05$ ).
